# Supplementary material
Source: PubMed Central journal article supplement (PMC6456549)
Supplement: ajtr0011-1428-f8.pdf [file ajtr0011-1428-f8.pdf]

# Identification of molecular biomarkers in HCC patients via plasma cfDNA

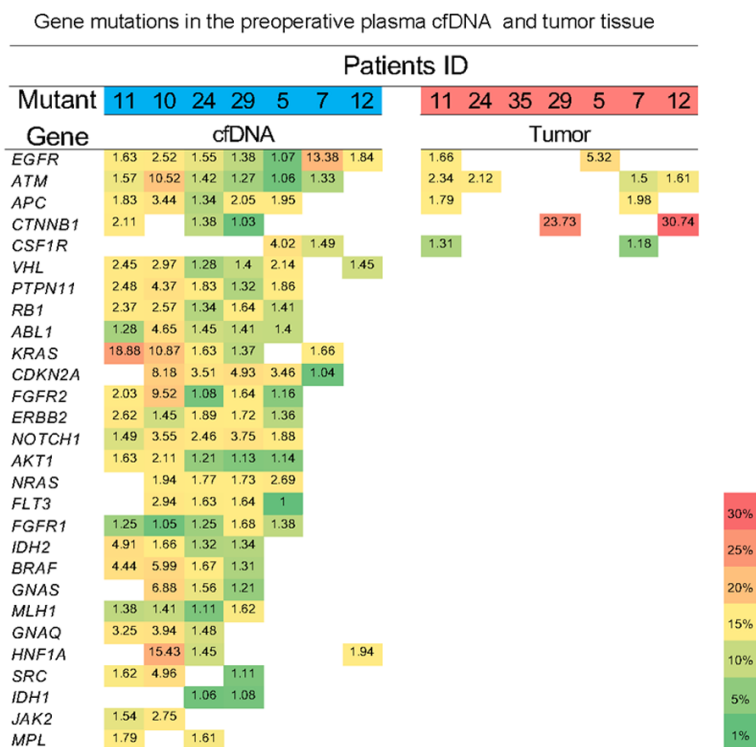

**Figure S1.** Mutant genes in paired tumor tissue DNA samples were not completely consistent with those in the preoperative plasma cfDNA. In the table, lower MAF values are shown in green and higher MAF values are shown in red.
